# Supplementary material
Source: publisher site journal article supplement (https://www.dovepress.com/article/369804)
Supplement: Supplementary file 1 [file get_supplementary_file.php]

**Supplementary Material**

**Supplementary Table 1** Classification of COPD exacerbation severity in the RESTORE study based on health care utilization

| **COPD exacerbation severity** | **Level of health care utilization** |
| --- | --- |
| Mild | Patient has an increased need for medication (bronchodilators), which he/she can manage in own normal environment |
| Moderate | Patient has increased need for medication (antibiotics and/or systemic corticosteroids) and feels the need to seek additional medical assistance |
| Severe | Patient/caregiver recognizes obvious and/or rapid deterioration in condition, requiring hospitalization or an emergency department visit |

Notes: Copyright ©2019. Dove Medical Press. Reproduced from Calverley PM, Page C, Dal Negro RW, et al. Effect of erdosteine on COPD exacerbations in COPD patients with moderate airflow limitation. *Int J Chron Obstruct Pulmon Dis*. 2019;14:2733‒2744.17

**Supplementary Table 2** Equivalent anti-inflammatory doses of systemic corticosteroids

| **Drug** | **Dose equivalent to 5 mg prednisolone** |
| --- | --- |
| Betamethasone | 750 μg |
| Deflazacort | 6 mg |
| Dexamethasone | 750 μg |
| Hydrocortisone | 20 mg |
| Methylprednisolone | 4 mg |
| Prednisone | 5 mg |
| Triamcinolone | 4 mg |

**Notes:** Information taken from British National Formulary (see <https://bnf.nice.org.uk/treatment-summary/glucocorticoid-therapy.html>). This table does not take account of mineralocorticoid effects or variations in duration of action.

**Supplementary Table 3** Baseline demographic and clinical characteristics of GOLD 2 patients with moderate COPDa who experienced exacerbations by exacerbation severity

|  | **Erdosteine**  **(N = 43)** | | **Placebo**  **(N = 62)** | |
| --- | --- | --- | --- | --- |
|  | **Mild exacerbation**  **(n = 36)** | **Moderate-to-severe exacerbation**  **(n = 7)** | **Mild exacerbation**  **(n = 48)** | **Moderate-to-severe exacerbation**  **(n = 14)** |
| Age, years | 63.4 (7.4) | 65.9 (7.9) | 65.3 (6.4) | 67.4 (7.7) |
| Male, % | 60.8 | 57.1 | 74.9 | 64.3 |
| BMI, kg/m2 | 27.8 (4.3) | 27.9 (5.1) | 28.1 (5.7) | 29.4 (5.9) |
| Smoking status, %  Current smoker  Ex-smoker | 31.2  68.8 | 57.1  42.9 | 28.1  71.9 | 64.3  35.7 |
| ICS, n (%) | 80 (76.9) | 7 (100.0) | 82 (64.2) | 13 (78.6) |
| FEV1, L | 1.58 (0.33) | 1.64 (0.38) | 1.61 (0.41) | 1.71 (0.45) |
| FEV1, % predicted | 61.84 (6.1) | 60.11 (6.4) | 62.98 (6.9) | 59.93 (6.7) |
| FVC, L | 2.84 (0.65) | 2.75 (0.67) | 2.91 (0.67) | 2.81 (0.75) |
| Post-BD FEV1/FVC, ratio % | 59.79 (8.9) | 54.71 (8.5) | 58.16 (8.5) | 55.08 (8.3) |

**Notes:** Data are presented as mean (standard deviation) unless indicated otherwise. All n values are numbers of patients. aDetermined post-hoc and based on GOLD 2022 spirometry criteria (FEV1 50‒79% predicted)

**Abbreviations:** BD, bronchodilator; BMI, body mass index; COPD, chronic obstructive pulmonary disease; FEV1, forced expiratory volume in 1 second; FVC, forced vital capacity; GOLD, global initiative for chronic obstructive lung disease; ICS, inhaled corticosteroid.

**Supplementary Table 4** Baseline demographic and clinical characteristics of GOLD 3 patients with severe COPDa who experienced exacerbations by exacerbation severity

|  | **Erdosteine**  **(N = 75)** | | **Placebo**  **(N = 86)** | |
| --- | --- | --- | --- | --- |
|  | **Mild exacerbation**  **(n = 20)** | **Moderate-to-severe exacerbation**  **(n = 55)** | **Mild exacerbation**  **(n = 22)** | **Moderate-to-severe exacerbation**  **(n = 64)** |
| Age, years | 61.0 (8.5) | 62.9 (8.9) | 63.1 (8.8) | 63.1 (8.8) |
| Male, % | 70.0 | 75.8 | 72.7 | 74.1 |
| BMI, kg/m2 | 27.5 (4.9) | 27.3 (5.1) | 27.3 (4.5) | 27.9 (5.0) |
| Smoking status, %  Current smoker  Ex-smoker | 30.0  70.0 | 25.5  74.5 | 27.3  72.7 | 25.0  75.0 |
| ICS, n (%) | 95 (92.6) | 79 (86.8) | 96 (82.4) | 91 (88.9) |
| FEV1, L | 1.25 (0.40) | 1.27 (0.37) | 1.21 (0.44) | 1.25 (0.46) |
| FEV1, % predicted | 48.71 (11.33) | 46.29 (11.89) | 46.89 (11.21) | 48.71 (10.98) |
| FVC, L | 2.57 (0.91) | 2.61 (1.01) | 2.55 (0.96) | 2.51 (0.89) |
| Post-BD FEV1/FVC, ratio % | 51.44 (9.92) | 51.99 (10.18) | 53.79 (10.11) | 54.82 (11.17) |

**Notes:** Data are presented as mean (standard deviation) unless indicated otherwise. All n values are numbers of patients. aDetermined post-hoc and based on GOLD 2022 spirometry criteria (FEV1 30‒49% predicted)

**Abbreviations:** BD, bronchodilator; BMI, body mass index; COPD, chronic obstructive pulmonary disease; FEV1, forced expiratory volume in 1 second; FVC, forced vital capacity; GOLD, global initiative for chronic obstructive lung disease; ICS, inhaled corticosteroid.

**Supplementary Table 5** St. George's Respiratory Questionnaire (SGRQ) score over time by COPD severity (GOLD 2 or 3), exacerbation severity (mild or moderate-to-severe), and treatment group

| **Exacerbations**  (n = number of exacerbations) | **Mean (SD) SGRQ score** | | | | | | ***P*-value for trend (erdosteine)** | ***P-value for trend (placebo)*** | ***P-value for treatment comparison*** |
| --- | --- | --- | --- | --- | --- | --- | --- | --- | --- |
| **Baseline** | | **6 months** | | **12 months** | |
| **Erdosteine** | **Placebo** | **Erdosteine** | **Placebo** | **Erdosteine** | **Placebo** |
| **GOLD 2 patients (N = 254)** | | | | | | | | | |
| All exacerbations (n = 127) | 38.5 (10.9) | 38.8 (11.4) | 30.4 (10.9) | 36.1 (11.3) | 30.9 (10.1) | 37.3 (11.9) | **0.014** | 0.354 | **<0.001** |
| Mild exacerbations (n = 89) | 33.3 (9.0) | 33.4 (11.2) | 26.0 (9.4)* | 32.1 (10.9) | 24.7 (9.0)* | 33.5 (11.5) | **0.012** | 0.423 | **<0.001** |
| Moderate-to-severe exacerbations (n = 38) | 44.4 (12.3) | 43.8 (11.8) | 40.2 (12.5) | 41.9 (11.6) | 37.2 (11.5)* | 42.2 (12.9) | **0.049** | 0.388 | **0.029** |
| **GOLD 3 patients (N = 191)** | | | | | | | | | |
| All exacerbations (n = 330) | 50.7 (17.3) | 49.2 (16.7) | 48.2 (15.3) | 50.1 (15.5) | 49.4 (17.0) | 51.2 (15.3) | 0.498 | 0.481 | 0.345 |
| Mild exacerbations (n = 197) | 48.1 (15.1) | 45.7 (16.5) | 45.3 (13.7) | 46.4 (14.8) | 46.2 (15.8) | 43.6 (14.9) | 0.602 | 0.229 | 0.354 |
| Moderate-to-severe exacerbations (n = 133) | 54.1 (19.2) | 54.8 (16.1) | 53.8 (17.3) | 55.6 (15.7) | 54.9 (16.9) | 57.2 (14.3) | 0.594 | 0.184 | 0.542 |
| **All RESTORE patients (N = 445)** | | | | | | | | | |
| All exacerbations (n = 457) | 45.4 (17.1) | 43.9 (16.5) | 43.5 (16.2) | 43.4 (16.4) | 41.1 (15.5) | 45.6 (15.9) | 0.386 | 0.422 | 0.357 |
| Mild exacerbations (n = 286) | 43.3 (16.2) | 41.9 (15.6) | 40.4 (14.3) | 42.5 (14.9) | 37.1 (16.2) | 43.1 (16.0) | 0.059 | 0.329 | 0.531 |
| Moderate-to-severe exacerbations (n = 171) | 49.1 (18.8) | 49.5 (17.1) | 47.4 (18.1) | 46.5 (19.1) | 48.2 (15.8) | 49.7 (16.5) | 0.538 | 0.501 | 0.365 |

**Note:** Score range for SGRQ total score is 0‒100, with higher scores reflecting a worse HRQoL. The analysis was conducted in the ITT population and was based on an ANCOVA model including the fixed effects of treatment. Changes in trend over time were analyzed using the REML or least squares method. *P*-values in bold are considered significant (< 0.05). **P* < 0.05 vs. placebo at each time point.

**Abbreviations:** ANCOVA, analysis of covariance; COPD, chronic obstructive pulmonary disease; GOLD, global initiative for chronic obstructive lung disease; HRQoL, health related quality of life; ITT, intention-to-treat; REML, Residual Maximum Likelihood; SGRQ, St George’s respiratory questionnaire; SD, standard deviation.

**Supplementary Table 6** Physician global assessment of disease severity over time by COPD severity (GOLD 2 or 3), exacerbation severity, and treatment group

| **Exacerbation severitya**  (n = number of exacerbations) | **Treatment** | **Mean (95% CI) score at:** | | | ***P*-value for trend** | ***P*-value for treatment comparison** |
| --- | --- | --- | --- | --- | --- | --- |
| **Baseline** | **6 months** | **12 months** |
| **GOLD 2 patients (N = 254)** | | | | | | |
| All exacerbations (n = 127) | Erdosteine | 1.47  (1.16‒2.06) | 1.36  (1.18‒1.93)* | 1.23  (0.91‒1.98)* | **0.019** | **< 0.001** |
| Placebo | 1.48  (1.16‒2.07) | 1.50  (1.24‒2.01) | 1.51  (1.17‒2.06) | 0.319 |
| Mild exacerbations (n = 89) | Erdosteine | 1.25  (1.10‒1.32) | 1.11  (1.09‒1.31) | 0.99  (0.82‒1.21)* | **0.012** | **< 0.001** |
| Placebo | 1.27  (1.14‒1.36) | 1.25  (1.11‒1.37) | 1.30  (1.14‒1.49) | 0.377 |
| Moderate-to-severe exacerbations (n = 38) | Erdosteine | 1.91  (1.65‒2.10) | 1.81  (1.73‒1.98) | 1.72  (1.64‒2.04)* | **0.036** | **0.032** |
| Placebo | 1.93  (1.85‒2.11) | 1.92  (1.82‒2.09) | 1.90  (1.79‒2.13) | 0.592 |
| **GOLD 3 patients (N = 191)** | | | | | | |
| All exacerbations (n = 330) | Erdosteine | 2.06  (1.77‒2.41) | 2.07  (1.81‒2.37) | 2.04  (1.85‒2.72) | 0.611 | 0.622 |
| Placebo | 2.05  (1.76‒2.49) | 2.09  (1.84‒2.47) | 2.10  (1.83‒2.60) | 0.273 |
| Mild exacerbations (n = 197) | Erdosteine | 1.92  (1.74‒2.14) | 1.89  (1.74‒2.19) | 1.86  (1.79‒2.15) | 0.099 | 0.709 |
| Placebo | 1.90  (1.72‒2.15) | 2.03  (1.78‒2.19) | 1.95  (1.79‒2.19) | 0.139 |
| Moderate-to-severe exacerbations (n = 133) | Erdosteine | 2.30  (2.22‒2.46) | 2.27  (2.10‒2.41) | 2.27  (2.15‒2.79) | 0.235 | 0.634 |
| Placebo | 2.27  (2.13‒2.53) | 2.35  (2.20‒2.59) | 2.34  (2.19‒2.71) | 0.119 |
| **All RESTORE patients (N = 445)** | | | | | | |
| All exacerbations (n = 457) | Erdosteine | 1.69  (1.54‒1.99) | 1.64  (1.39‒1.93) | 1.53  (1.39‒1.92)* | **0.048** | **0.039** |
| Placebo | 1.72  (1.49‒1.95) | 1.68  (1.45‒2.01) | 1.68  (1.47‒1.94) | 0.265 |
| Mild exacerbations (n = 286) | Erdosteine | 1.55  (1.41‒1.81) | 1.47  (1.33‒1.80) | 1.39  (1.30‒1.92)* | **0.041** | **0.037** |
| Placebo | 1.52  (1.42‒1.85) | 1.50  (1.35‒1.93) | 1.47  (1.29‒1.96) | 0.124 |
| Moderate-to-severe exacerbations (n = 171) | Erdosteine | 1.96  (1.64‒2.21) | 1.95  (1.59‒2.31) | 1.90  (1.55‒2.29) | 0.541 | 0.284 |
| Placebo | 1.94  (1.69‒2.24) | 1.96  (1.62‒2.34) | 1.91  (1.66‒2.31) | 0.528 |

**Notes:** Data are presented as mean (95% CI). Scores range from 0‒4, with higher scores representing worse subjective disease severity. aPatients may have experienced more than one exacerbation during the 12 months of treatment; they were grouped as having mild or moderate-to-severe exacerbations. Patients in the moderate-to-severe exacerbations subgroup may also have had mild exacerbations, but patients in the mild exacerbations subgroup did not have moderate-to-severe exacerbations during the 12 months of treatment. The analysis was conducted in the ITT population and was based on an ANCOVA model including the fixed effects of treatment. Changes in trend over time were analyzed using the REML or least squares method. *P*-values in bold are considered significant (< 0.05). **P* < 0.05 vs placebo at each time point.

**Abbreviations:** ANCOVA, analysis of covariance; CI, confidence interval; GOLD, global initiative for chronic obstructive lung disease; ITT, intention-to-treat; REML, residual maximum likelihood
